# Supplementary material
Source: Springer Nature journal article supplement (http://www.springermedizin.de/resource/supplementary/12937_2012_533_MOESM1_ESM.pdf/25653566)

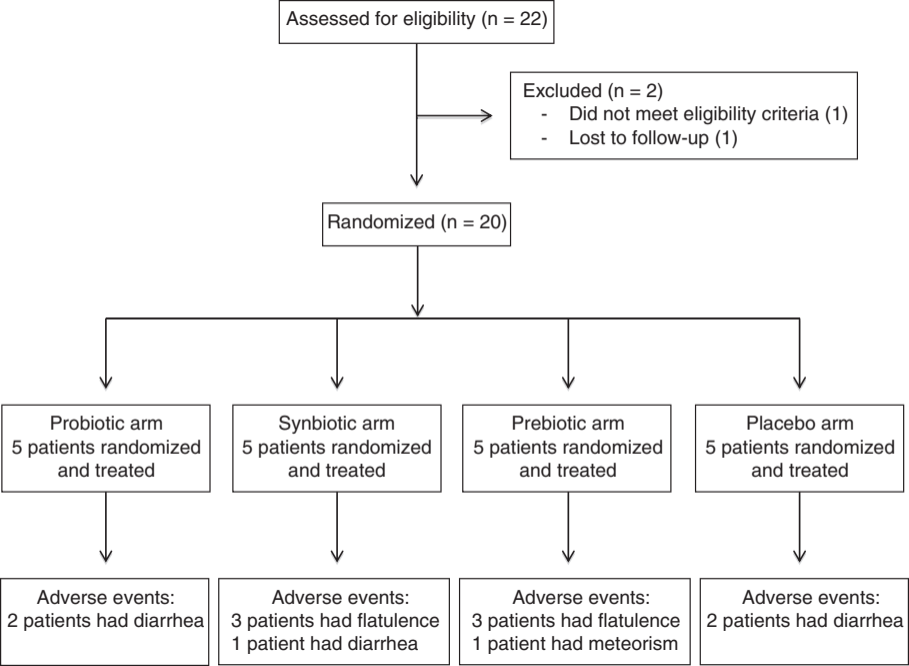

Supplement: MOESM1 [file 25653566]
